# Supplementary material
Source: HighWire-hosted journal article supplement (https://www.cmaj.ca/highwire/filestream/148738/field_highwire_adjunct_files/0/230111-image-1-at.pdf)
Supplement: 230111-image-1-at.pdf [file 230111-image-1-at.pdf]

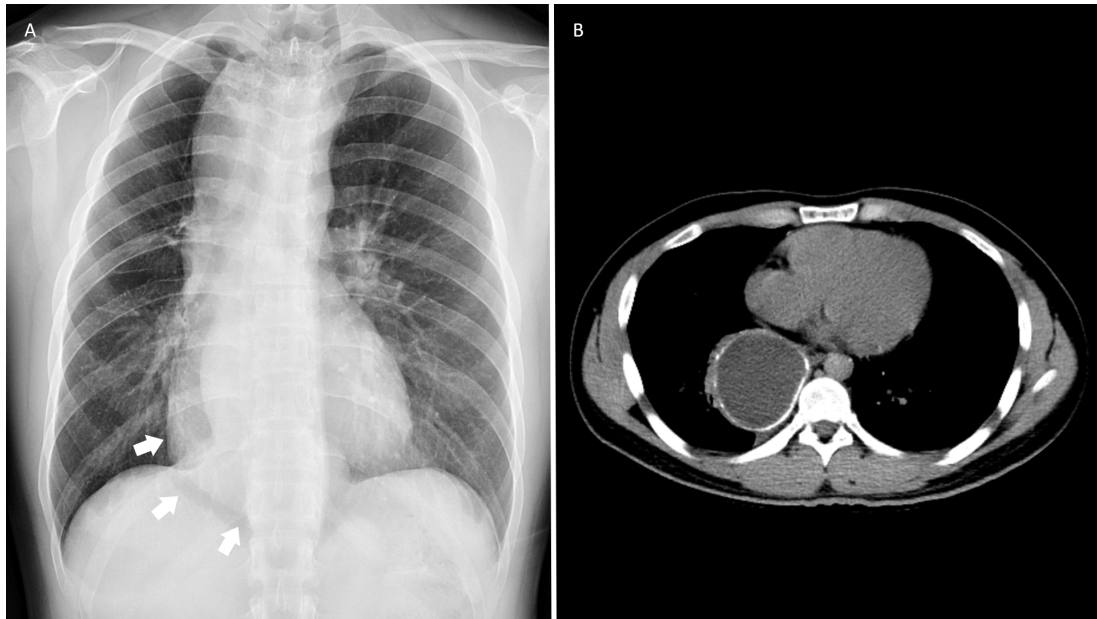

Appendix 1: (A) Chest radiograph showed lateralization of the azygosophageal recess with a right posterior mediastinal mass density(arrows). (B) CT scan in axial view showed a markedly dilated esophagus with a thick, calcified wall.
